# Supplementary material for: MpsAB is important for Staphylococcus aureus virulence and growth at atmospheric CO2 levels
Source: PubMed Central journal article supplement (PMC6689103; doi:10.1038/s41467-019-11547-5), 2019-08-09
Supplement: 41467_2019_11547_MOESM1_ESM.pdf [file 41467_2019_11547_MOESM1_ESM.pdf]

## Supplementary Information

**MpsAB is important for *Staphylococcus aureus* virulence and growth under atmospheric CO<sub>2</sub> levels**

**Fan et al.**

| Strains       |                 | Day 1                                                                               | Day 2                                                                               | Day 3                                                                               | Day 4                                                                               | Day 5                                                                                |
|---------------|-----------------|-------------------------------------------------------------------------------------|-------------------------------------------------------------------------------------|-------------------------------------------------------------------------------------|-------------------------------------------------------------------------------------|--------------------------------------------------------------------------------------|
| HG001         | A               |    |    |    |    |    |
|               | CO <sub>2</sub> |    |    |    |    |    |
| $\Delta mpsA$ | A               |    |    |    |    |    |
|               | CO <sub>2</sub> |    |    |    |    |    |
| pRB473-mpsA   | A               |    |    |    |    |    |
|               | CO <sub>2</sub> |    |    |    |    |    |
| $\Delta mpsB$ | A               |    |    |    |    |    |
|               | CO <sub>2</sub> |    |    |    |    |    |
| pctuf-mpsB    | A               |   |   |   |   |   |
|               | CO <sub>2</sub> |  |  |  |  |  |
| $\Delta mpsC$ | A               |  |  |  |  |  |
|               | CO <sub>2</sub> |  |  |  |  |  |
| pRB473-mpsC   | A               |  |  |  |  |  |
|               | CO <sub>2</sub> |  |  |  |  |  |

**Supplementary Figure 1: Growth of HG001  $\Delta mpsA$ ,  $\Delta mpsB$  and  $\Delta mpsC$**

Colony appearance of wild type HG001,  $\Delta mpsA$ ,  $\Delta mpsB$  and  $\Delta mpsC$  and its corresponding complemented mutant during five days of incubation in atmospheric conditions and 5% CO<sub>2</sub>. White bar represents a scale of 1 mm.

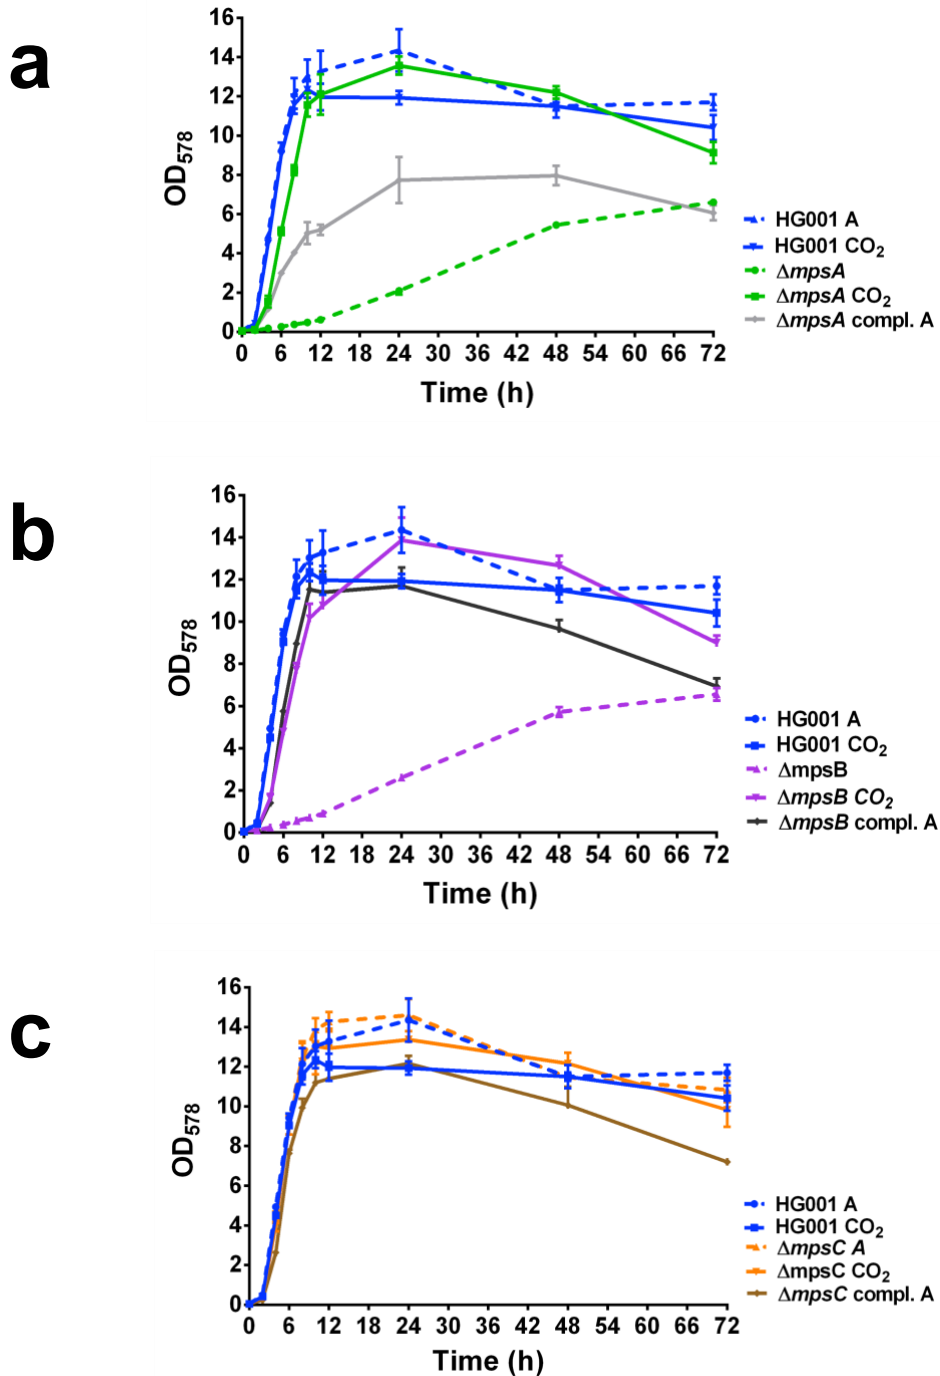

**Supplementary Figure 2: Growth of HG001 *mps* deletion mutants**

Growth of HG001, (a)  $\Delta mpsA$ , (b)  $\Delta mpsB$  and (c)  $\Delta mpsC$  and their corresponding complemented mutant in atmospheric conditions (A) and 5% CO<sub>2</sub>. The growth of the deletion mutant *mpsA* and *mpsC* can also be complemented by plasmid pRB473 carrying *mpsA* and *mpsC* respectively. The growth of deletion mutant *mpsB* was complemented by plasmid pctuf carrying *mpsB*. Each point shown in the graph represents the mean value  $\pm$  standard error mean (SEM) from three independent experiments. Source data are provided as a Source Data file.

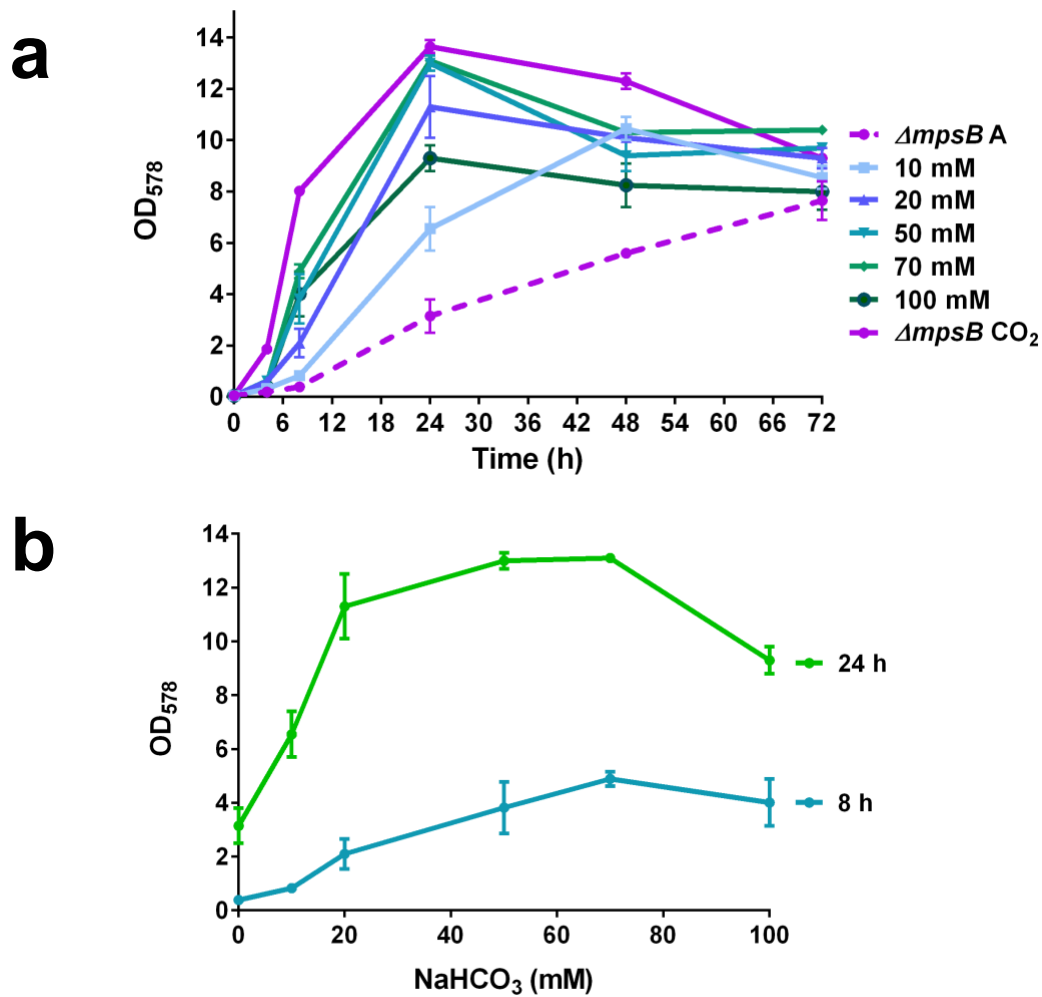

**Supplementary Figure 3: Growth of HG001  $\Delta mpsB$  can be complemented with  $\text{NaHCO}_3$**

(a) Growth of  $\Delta mpsB$  in atmospheric (A) and with additions of  $\text{NaHCO}_3$  and also 5%  $\text{CO}_2$ . Each concentration of  $\text{NaHCO}_3$  is indicated in the graph, ranging from 10 mM to 100 mM. Additions of  $\text{NaHCO}_3$  improved the growth of  $\Delta mpsB$  in a concentration dependent manner up to 70 mM. Each point shown in the graph represents the mean value  $\pm$  standard error mean (SEM) from two independent experiments.

(b) The same graph illustrated with OD as a function of bicarbonate concentration at 8 h and 24 h. Source data are provided as a Source Data file.

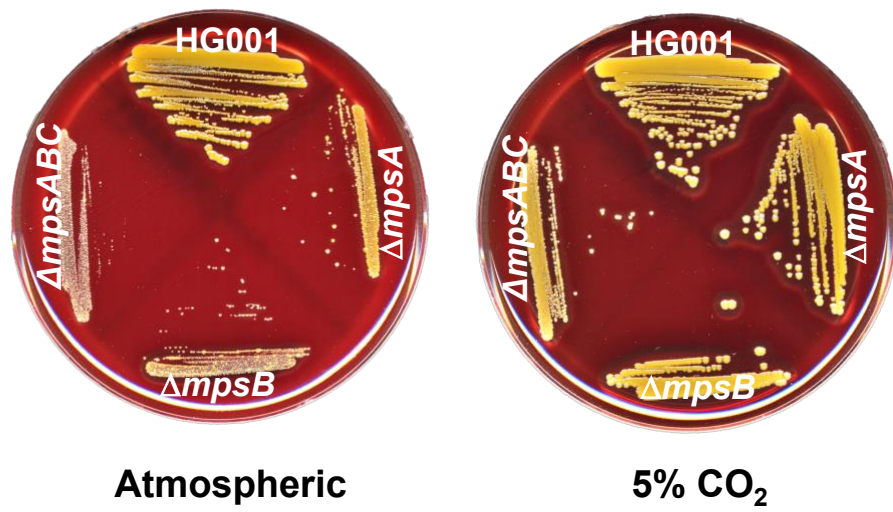

**Supplementary Figure 4: The production of hemolytic toxin in HG001 and its three *mps* mutant strains ( $\Delta mpsA$ ,  $\Delta mpsB$  and  $\Delta mpsABC$ ) grown under atmospheric and 5% CO<sub>2</sub> conditions.**

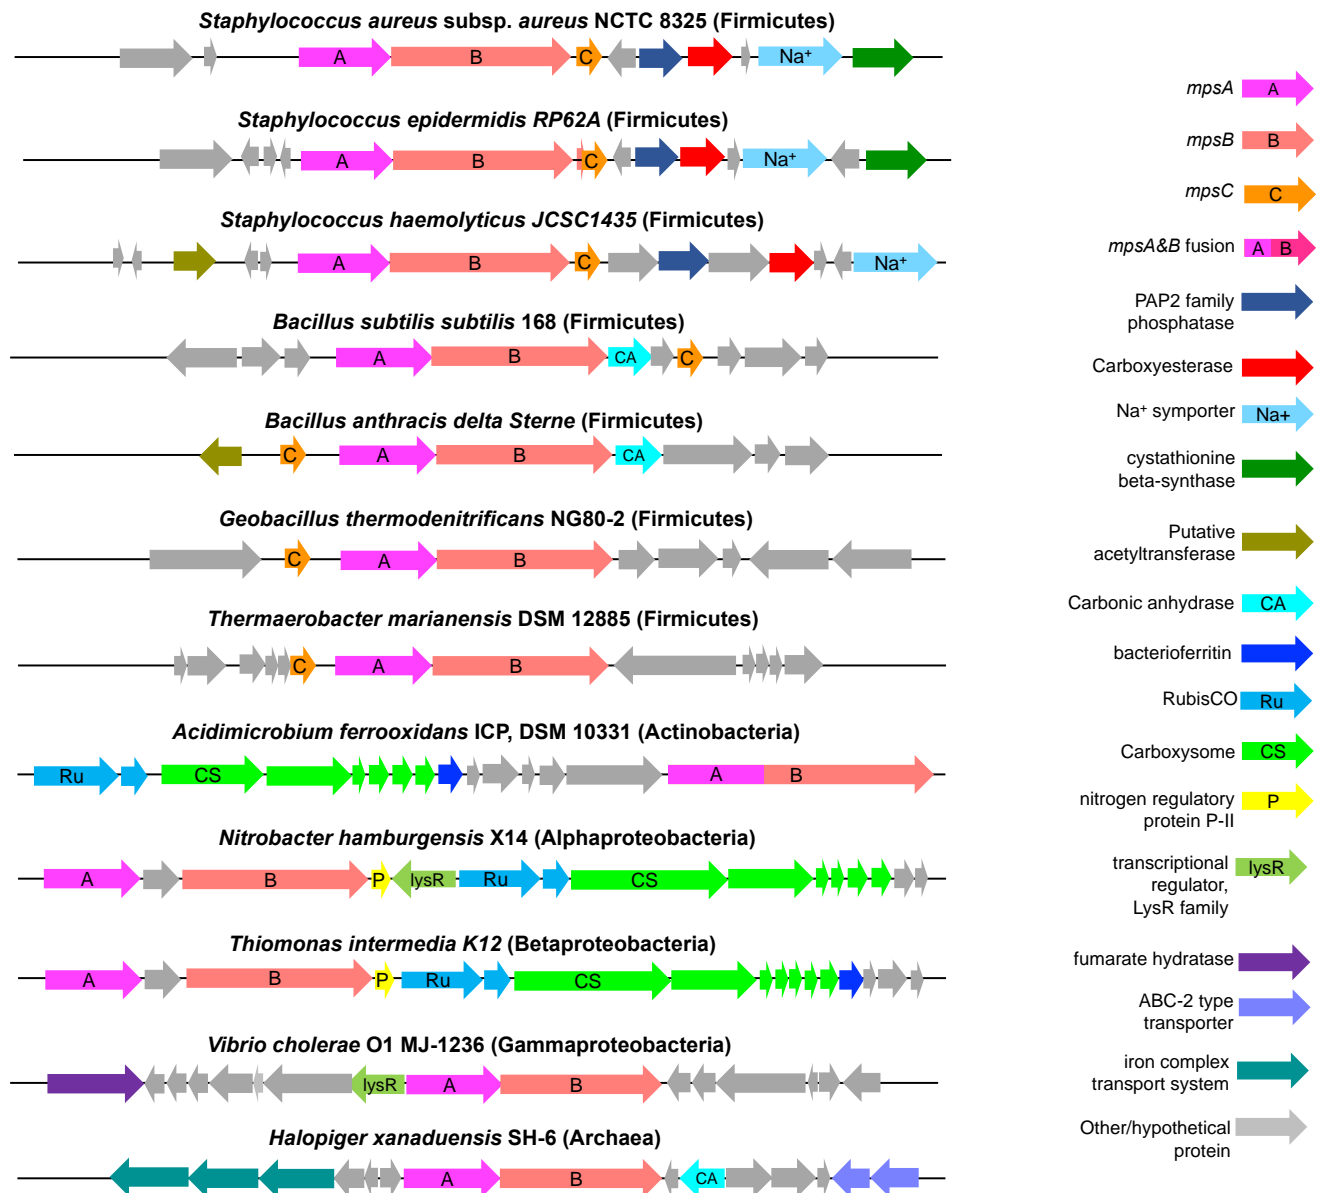

**Supplementary Figure 5: Gene synteny presenting the genome organization around *mpsAB* in *S. aureus* and its homologs in selected genomes**  
*mpsAB* homologs are almost always collocated. Homologs of *mpsAB* exist as a single fused gene in *Acidimicrobium ferrooxidans*. *mpsAB* always points to the right, even if it is located on the complementary strand.

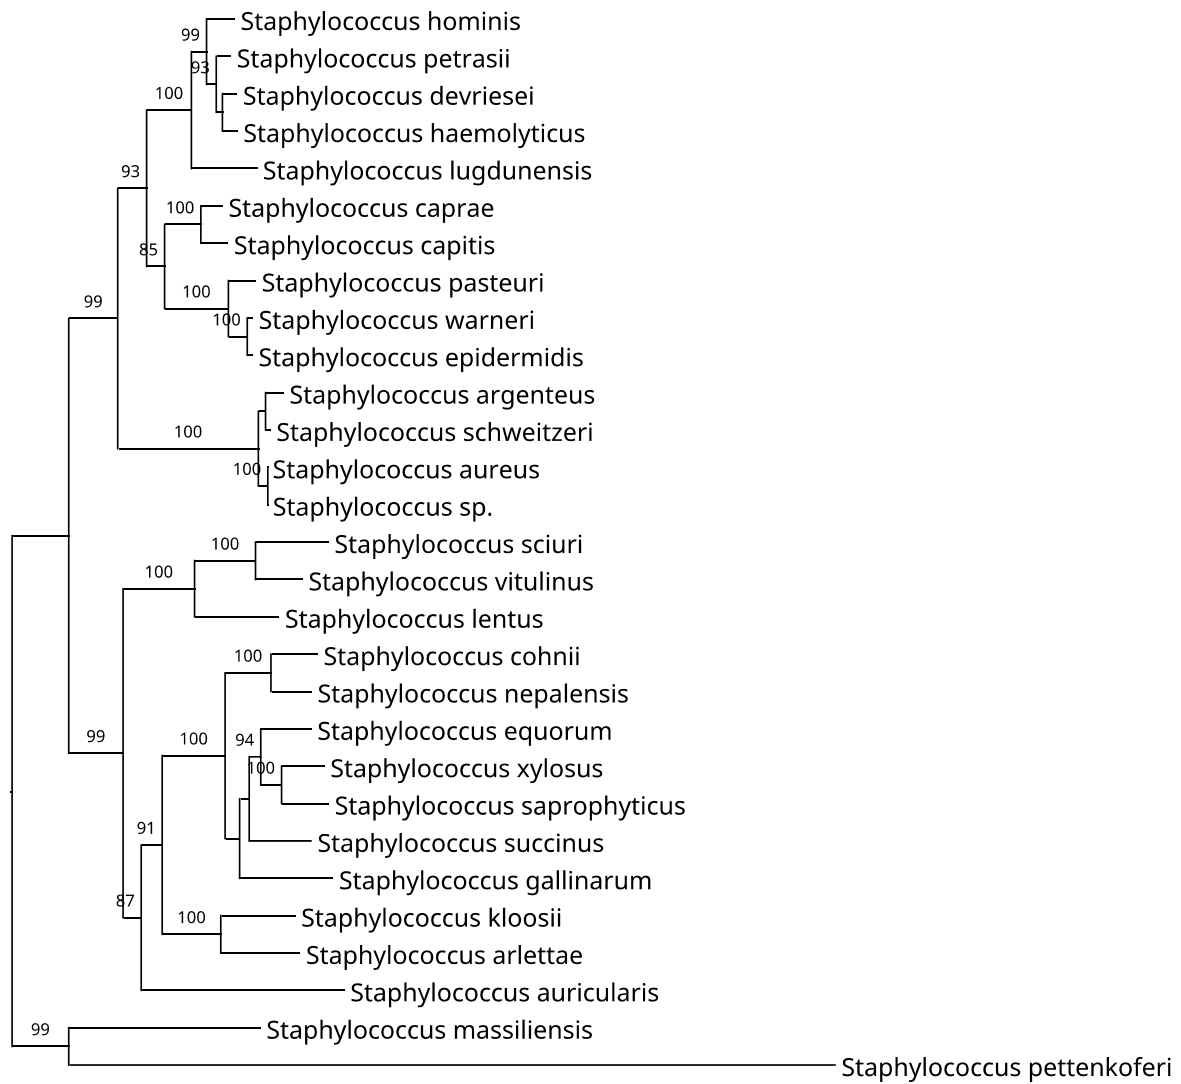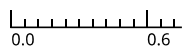

### Supplementary Figure 6: Phylogenetic tree of Staphylococci

Maximum likelihood phylogenetic analysis of concatenated alignments of *mpsA* and *mpsB* homologs amongst the genus *Staphylococcus*. Node support is indicated by bootstrap values from 100 resamplings of the alignment when they exceeded 70%. Source data are provided as a Source Data file.

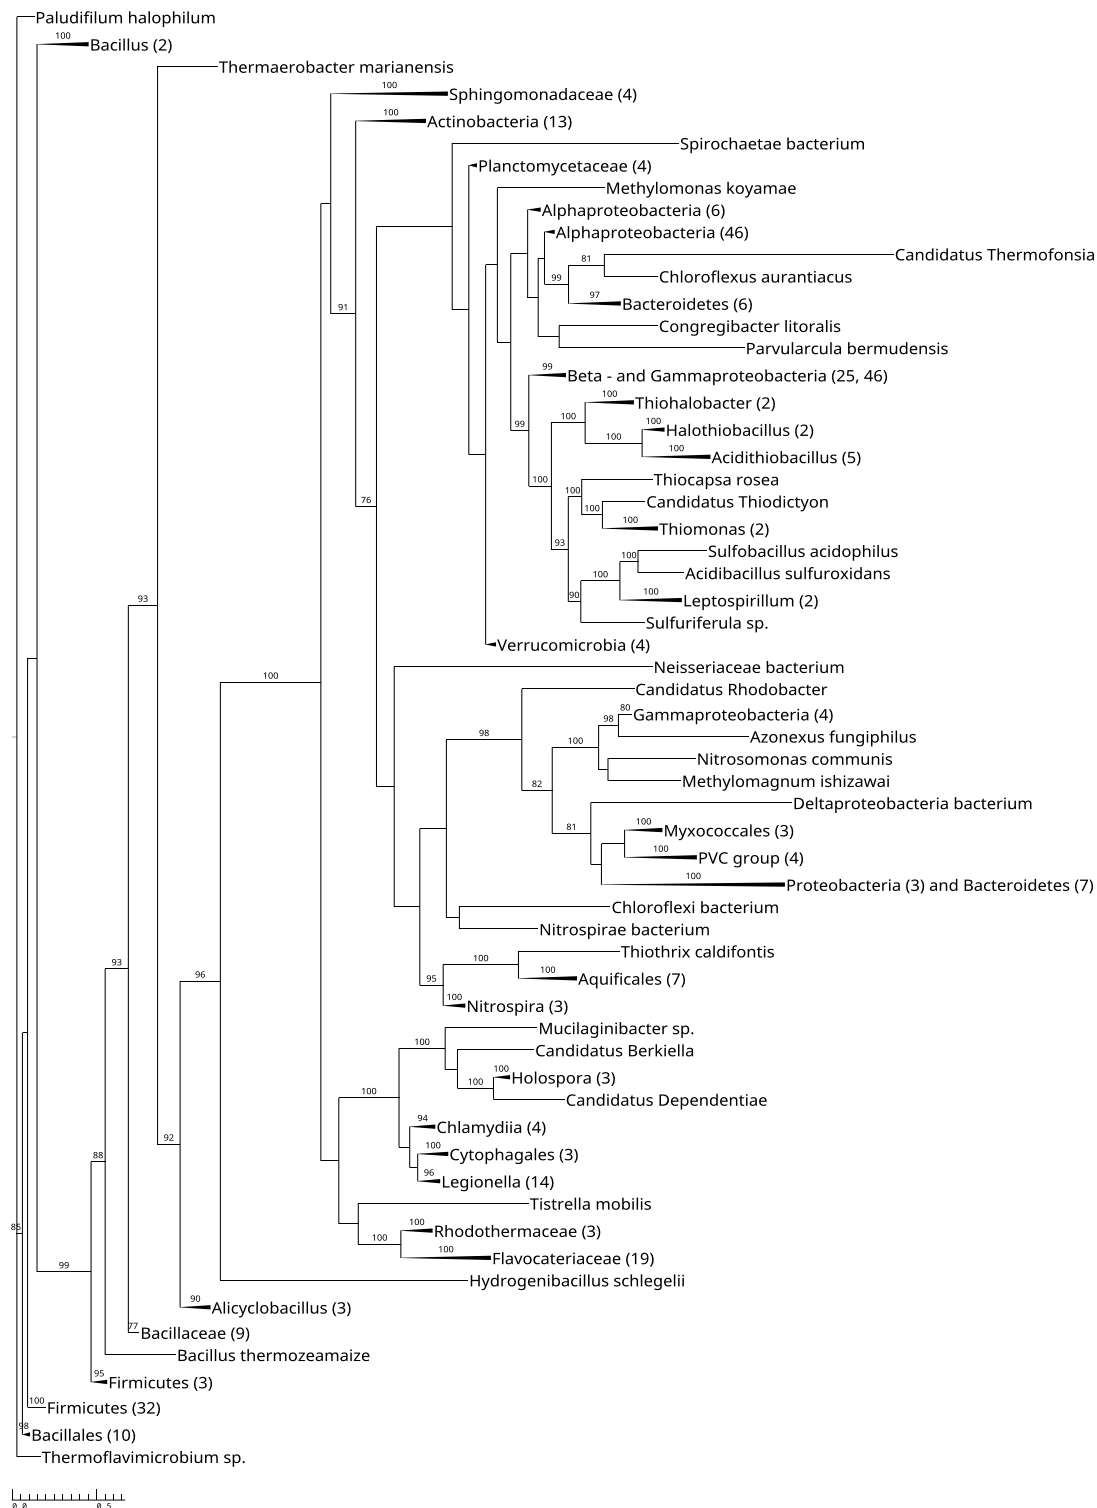

### Supplementary Figure 7: Phylogenetic tree of all bacterial phyla

Maximum likelihood phylogenetic analysis of concatenated alignments of *mpsA* and *mpsB* homologs amongst the bacterial domain. Node support is indicated by bootstrap values from 100 resamplings of the alignment when they exceeded 70%. Collapsed clades are labeled by the shared taxonomic rank of associated taxa. The number of taxa belonging to the respective clade is indicated in brackets. Source data are provided as a Source Data file.



**Supplementary Table 1: Bacterial strains used in this study**

| Strain                                                          | Description                                                                                                                                               | Reference or source |
|-----------------------------------------------------------------|-----------------------------------------------------------------------------------------------------------------------------------------------------------|---------------------|
| <i>E. coli</i> EDCM636                                          | <i>E. coli</i> MG1655 ( $\Delta canA1:: FLK2(lacZ,kan)$ , $\lambda^-$ , $\Delta fnr-267,rph-1$ ) replacement of <i>can</i> by kanamycin resistance marker | <sup>1</sup>        |
| <i>E. coli</i> EDCM636 <i>mpsA</i>                              | <i>E. coli</i> EDCM636 (pRB473- <i>mpsA</i> ) carrying <i>mpsA</i>                                                                                        | This study          |
| <i>E. coli</i> EDCM636 <i>mpsB</i>                              | <i>E. coli</i> EDCM636 (pRB473- <i>mpsB</i> ) carrying <i>mpsB</i>                                                                                        | This study          |
| <i>E. coli</i> EDCM636 <i>mpsAB</i>                             | <i>E. coli</i> EDCM636 (pRB473- <i>mpsAB</i> ) carrying <i>mpsA</i> and <i>mpsB</i>                                                                       | This study          |
| <i>E. coli</i> EDCM636 <i>mpsABC</i>                            | <i>E. coli</i> EDCM636 (pRB473- <i>mpsABC</i> ) carrying <i>mpsA</i> , <i>mpsB</i> and <i>mpsC</i>                                                        | This study          |
| <i>S. aureus</i> HG001                                          | NCTC8325 derivative with repaired <i>rsbU</i>                                                                                                             | <sup>2</sup>        |
| <i>S. aureus</i> HG001 $\Delta mpsA$                            | $\Delta mpsA$ (deletion of SAOUHSC_00412)                                                                                                                 | This study          |
| <i>S. aureus</i> HG001 $\Delta mpsB$                            | $\Delta mpsB$ (deletion of SAOUHSC_00413)                                                                                                                 | This study          |
| <i>S. aureus</i> HG001 $\Delta mpsC$                            | $\Delta mpsC$ (deletion of SAOUHSC_00414)                                                                                                                 | This study          |
| <i>S. aureus</i> HG001 $\Delta mpsABC$                          | $\Delta mpsABC$ (deletion of SAOUHSC_00412, SAOUHSC_00413, SAOUHSC_00414)                                                                                 | This study          |
| <i>S. aureus</i> HG001 $\Delta mpsA$ (pRB473- <i>mpsA</i> )     | <i>S. aureus</i> HG001 $\Delta mpsA$ complemented with <i>mpsA</i>                                                                                        | This study          |
| <i>S. aureus</i> HG001 $\Delta mpsB$ (pctuf- <i>mpsB</i> )      | <i>S. aureus</i> HG001 $\Delta mpsB$ complemented with <i>mpsB</i>                                                                                        | This study          |
| <i>S. aureus</i> HG001 $\Delta mpsC$ (pRB473- <i>mpsC</i> )     | <i>S. aureus</i> HG001 $\Delta mpsC$ complemented with <i>mpsC</i>                                                                                        | This study          |
| <i>S. aureus</i> HG001 $\Delta mpsABC$ (pRB473- <i>mpsABC</i> ) | <i>S. aureus</i> HG001 $\Delta mpsABC$ complemented with <i>mpsABC</i>                                                                                    | This study          |
| <i>S. aureus</i> HG001 $\Delta mpsABC$ (pTX30- <i>can</i> )     | <i>S. aureus</i> HG001 $\Delta mpsABC$ with insertion of carbonic anhydrase, <i>can</i> from <i>E. coli</i> MG1655)                                       | This study          |
| <i>S. aureus</i> USA300                                         | Community-associated methicillin resistant clinical isolate, pulsed- field type USA300                                                                    | <sup>3</sup>        |
| <i>S. aureus</i> USA400(MW2)                                    | Community-associated methicillin resistant clinical isolate, pulsed- field type USA400                                                                    | <sup>4</sup>        |

**Supplementary Table 2: Oligonucleotides used in this study**

| <b>Primer name</b>                                                                          | <b>Sequence (5'→3')</b>                                  |
|---------------------------------------------------------------------------------------------|----------------------------------------------------------|
| For the construction of <i>S. aureus</i> HG001 $\Delta$ <i>mpsB</i>                         |                                                          |
| mpsB_up_fwd                                                                                 | CCGGGCTAGCGCGCAGATCTGTA ACTATTTATATTGCG<br>ACTG          |
| mpsB_up_rev                                                                                 | CCA ACTTTTTAACTGTGTTGTCATACCTTTC                         |
| mpsB_down_fwd                                                                               | ACAACACAGTTAAAAAGTTGGATTTAACGATGATATG                    |
| mpsB_down_rev                                                                               | GCTTGATATCGTCGACAGATCTTATTTTTGTCTATATAG<br>CGTTAATCATTAC |
| For the construction of <i>S. aureus</i> HG001 $\Delta$ <i>mpsC</i>                         |                                                          |
| mpsC_up_fwd                                                                                 | GGTACCCGGGCTAGCGCGCAGATCTCAAGCGGTTTTAA<br>TGCTAAG        |
| mpsC_up_rev                                                                                 | TATGCTTTTCTTTCGTTCTTTTCATATCACTAAC                       |
| mpsC_down_fwd                                                                               | AAGAACGAAAGAAAAGCATATTTAAGAAGGTTAGG                      |
| mpsC_down_rev                                                                               | CAAGCTTGATATCGTCGACAGATCTCCAACCGCTAAAT<br>GCCTC          |
| For the construction of <i>S. aureus</i> HG001 $\Delta$ <i>mpsB</i> complementation plasmid |                                                          |
| pc_mpsB_fwd                                                                                 | GTTTCGAGGAGGTTTAATTAATGACAACACAGTTAAATAT<br>CAATTC       |
| pc_mpsB_rev                                                                                 | TAAGTACTTCAGCTAATTAAGCTTAAATCCA ACTTTTTAAA<br>ACGCC      |
| For the construction of <i>S. aureus</i> HG001 $\Delta$ <i>mpsC</i> complementation plasmid |                                                          |
| pmpsA_com_fwd                                                                               | ATCCCCGGGTACCGAGCTCGAATTCTTATTTTTAAAAGGA<br>CGGGAAATAC   |
| pmpsA_com_rev                                                                               | ACTAACTCCATATTTCTAATCTCTCGCATAATTG                       |
| mpsC_com_fwd                                                                                | GATTAGAAATATGGAGTTAGTGATATGAAAAGAAC                      |
| mpsC_com_Rev                                                                                | CAAGCGCTCATCGCAGTGCGAATTCATTCATCCACGTA<br>ATAAACAC       |
| For the construction of plasmids pRB473- <i>mpsAB</i> and pRB473- <i>mpsB</i>               |                                                          |
| PmpsABC Fwd                                                                                 | CCTGCAGGTCTGACTCTAGAGGATCCGGACGGGAAATA<br>CTGCCTAAC      |
| PmpsABC Rev                                                                                 | TTCACCTCCTTATTTCTAATCTCTCGCATAATTGCTTATG                 |
| SD+mpsB Fwd                                                                                 | AGAGATTAGAAATAAGGAGGTGAAAGGTATGAC                        |
| SD+mpsB Rev                                                                                 | TCGCAGTGCGAATTCGAGCTCTTAAATCCA ACTTTTTAAA<br>ACGC        |
| For the construction of plasmid pTX30- <i>can</i>                                           |                                                          |
| BgIII_SD_can_fwd                                                                            | AATGTAAGATCTAGGAGGTTTAATTAATGAAAGACATAG<br>ATACACTCATCAG |
| can_rev_EcoRI                                                                               | ATTATAGAATTCATATTATTTGTGGTTGGCGTGTTTCAG                  |
| For qRT-PCR                                                                                 |                                                          |
| mpsA qpcr Fwd                                                                               | TTTGCAGTCATTGGCTTTTTTCGGT                                |
| mpsA qpcr Rev                                                                               | AAGATGCAAACGACGTAATCGCAGT                                |
| gyrB Fwd                                                                                    | AAGGTATTATGGCGGCACGTG                                    |
| gyrB Rev                                                                                    | ATCGCCTGCGTTCTAGAGTCAC                                   |

## Supplementary Note 1

For Figure 2b in the manuscript, the pH levels were checked at the beginning of the experiment. The pH of the medium (TSB) increased with increased concentration of  $\text{NaHCO}_3$ , as shown in the Supplementary Table 3.

**Supplementary Table 3: pH of medium with addition of  $\text{NaHCO}_3$**

| Supplementation        | pH of medium (TSB) at the beginning |
|------------------------|-------------------------------------|
| Aerobic                | 7.173                               |
| 1 mM $\text{NaHCO}_3$  | 7.199                               |
| 5 mM $\text{NaHCO}_3$  | 7.306                               |
| 10 mM $\text{NaHCO}_3$ | 7.380                               |
| 50 mM $\text{NaHCO}_3$ | 7.782                               |
| $\text{CO}_2$          | 7.156                               |

In addition, we checked the effect of pH on the growth of  $\Delta\text{mpsABC}$  (see figures below). For this reason, we used  $\text{NaHCO}_3$  at 20 mM which gave an initial pH of 7.582. As can be seen from Supplementary Figure 8, the growth of the  $\Delta\text{mpsABC}$  in  $\text{CO}_2$  and  $\text{NaHCO}_3$  were similar (left), although the pH for the medium with  $\text{NaHCO}_3$  was higher (right), indicating that pH of the medium does not play a crucial role in promoting the growth.

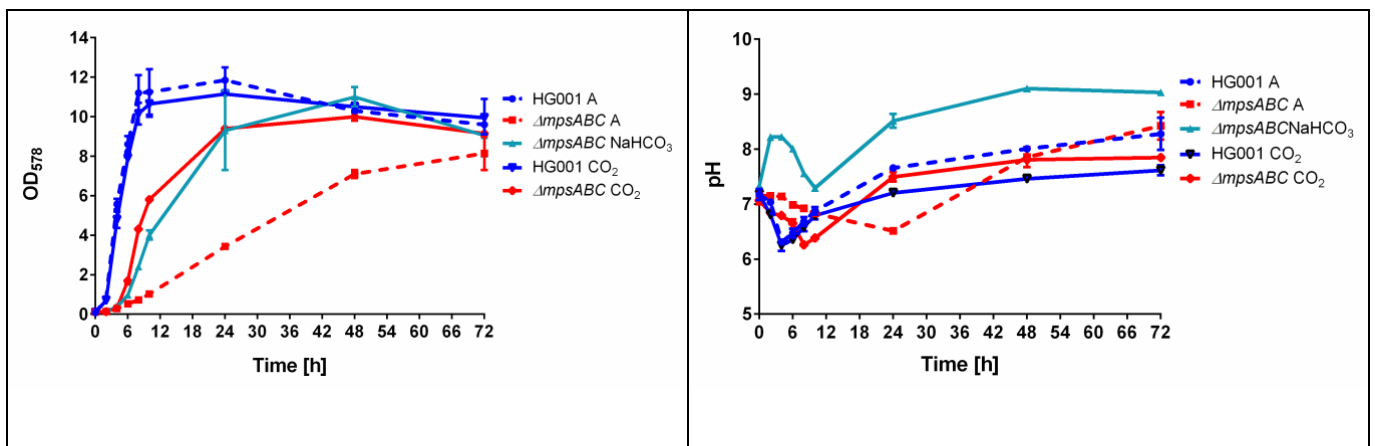

**Supplementary Figure 8: Growth (left) and extracellular pH (right) of wild type HG001 and  $\Delta\text{mpsABC}$  in atmospheric conditions (A) and 5%  $\text{CO}_2$  and 20 mM  $\text{NaHCO}_3$ .**

Each point shown in the graph represents the mean value  $\pm$  standard error mean (SEM) from two independent experiments.

## Supplementary References

1. Merlin C, Masters M, McAteer S, Coulson A. Why is carbonic anhydrase essential to *Escherichia coli*? *J Bacteriol* **185**, 6415-6424 (2003).
2. Herbert S, *et al.* Repair of global regulators in *Staphylococcus aureus* 8325 and comparative analysis with other clinical isolates. *Infect Immun* **78**, 2877-2889 (2010).
3. Diep BA, *et al.* Complete genome sequence of USA300, an epidemic clone of community-acquired methicillin-resistant *Staphylococcus aureus*. *Lancet* **367**, 731-739 (2006).
4. Baba T, *et al.* Genome and virulence determinants of high virulence community-acquired MRSA. *Lancet* **359**, 1819-1827 (2002).
